# Supplementary material for: Thermodynamic properties of benzyl halides: enthalpies of formation, strain enthalpies, and carbon–halogen bond dissociation enthalpies
Source: Royal Society of Chemistry journal article supplement (doi:10.1039/b301771k), 2003-01-01
Supplement: tables.doc [file tables.doc]

Electronic Supplementary information.

Thermodynamic properties of benzyl halides: Enthalpies of formation, strain enthalpies, and carbon–halogen bond dissociation enthalpies.

Sergey P. Verevkin,Eugen L. Krasnykh, and James S. Wright

Institute of Physical Chemistry, University of Rostock, Hermannstr. 14,

18051 Rostock, Germany

E-mail: sergey.verevkin@chemie.uni-rostock.de

TABLE S1. System tert-Amyl Benzyl Ether  Benzyl alcohol + Reaction IV Experimentally Determined Composition of Equilibrium Mixtures and *K*x–values in the Liquid Phase, (*T* is temperature of investigation; n is number of determinations of composition within the time of equilibrium study; *x*i is the mole fraction measured chromatographically)

| *T/*K | *n* | *x*2MB1a | *x*2MB2 | *x*BuOH | *x*Bu-O-tAm | *x*BzOH | *x*BzOtAm | *K*x |
| --- | --- | --- | --- | --- | --- | --- | --- | --- |
| 303.4 | 4 | 0.0091 | 0.0493 | 0.2144 | 0.2084 | 0.2739 | 0.2448 | 5.5  0.4 |
| 312.7 | 3 | 0.0075 | 0.0789 | 0.2193 | 0.2067 | 0.2701 | 0.2175 | 9.8  0.6 |
| 313.2 | 4 | 0.0077 | 0.0571 |  |  | 0.5777 | 0.3575 | 9.2  0.1 |
| 313.2 | 4 | 0.0038 | 0.0177 |  |  | 0.8367 | 0.1419 | 10.2  0.3 |
| 322.4 | 6 | 0.0066 | 0.0442 | 0.5095 | 0.1658 | 0.2092 | 0.0646 | 14.3  0.4 |
| 323.2 | 4 | 0.0069 | 0.0528 |  |  | 0.6950 | 0.2452 | 15.0  0.2 |
| 323.2 | 5 | 0.0076 | 0.0342 |  |  | 0.8086 | 0.1495 | 18.3  0.6 |
| 333.2 | 3 | 0.0127 | 0.1058 |  |  | 0.6103 | 0.2712 | 23.4 0.4 |
| 333.2 | 4 | 0.0057 | 0.0360 |  |  | 0.8447 | 0.1136 | 26.7  2.1 |
| 343.2 | 4 | 0.0112 | 0.0905 |  |  | 0.7246 | 0.1737 | 38.1  3.1 |
| 343.2 | 4 | 0.0103 | 0.0509 |  |  | 0.8372 | 0.1016 | 41.2  1.6 |
| 343.4 | 3 | 0.0075 | 0.0505 | 0.5955 | 0.0908 | 0.2252 | 0.0304 | 37.4  1.1 |
| 353.2 | 3 | 0.0289 | 0.1831 |  |  | 0.6112 | 0.1768 | 62.2  1.2 |
| 353.2 | 4 | 0.0056 | 0.0616 |  |  | 0.8536 | 0.0792 | 67.0  3.6 |
| 354.2 | 3 | 0.0067 | 0.0584 | 0.6372 | 0.0632 | 0.2164 | 0.0181 | 69.8  3.9 |
| 368.2 | 5 | 0.0309 | 0.2396 | 0.3584 | 0.1123 | 0.2097 | 0.0490 | 101.0  2.2 |
| 371.2 | 3 | 0.0221 | 0.184 |  |  | 0.6884 | 0.1055 | 120.0  5.4 |
| 371.2 | 2 | 0.0121 | 0.0860 |  |  | 0.8469 | 0.0549 | 135.3  7.6 |

a Isomer 2-methyl-buten-1

**TABLE S2. Results for a Typical Combustion Experiment at T = 298.15 K (p° = 0.1 MPa)a**

|  | Benzyl tert-amyl ether |
| --- | --- |
| m (substance) /g b | 0.303614 |
| m' (cotton) /g b | 0.001073 |
| m'' (polythen) /g b | 0.446256 |
| Tc /Kc | 1.30070 |
| (calor)·(-*T*c) /J | -32654.11 |
| cont)·(-Tc) /J | -18.70 |
| Ucorr. /Jd | 12.63 |
| -m'·cu' /J | 18.20 |
| - m''·cu'' /J | 20688.9 |
| cu° (substance) /(J g-1) | -39364.6 |

a For the definition of the symbols see reference Hubbard et al.48;: *T*h = 298.15 K; *V*(bomb) = 0.2664 dm3; *p*i(gas) = 3.04 MPa; *m*i(H2O) = 0.78 g; *U*(ign) = 1.46 J; *m*(Pt) = 12.18 g; b Masses obtained from apparent masses. c *T*c = *T*f - *T*i + *T*corr; (cont)·(-Tc) =(icont )·(*T*i - 298.15 K) + (fcont)·(298.15 K - *T*f + *T*corr.). calor = (25105.0±1.3) J·K-1; d *U*corr, the correction to standard state, is the sum of items 81 to 85, 87 to 90, 93, and 94 in reference Hubbard et al., 48

**TABLE S3. Summary of Experimental Energies of Combustion of Benzyl tert-amyl ether and Standard Molar Thermodynamic Functions at T = 298.15 K (p*°* = 0.1 MPa).**

Benzyl tert-amyl ether

[(cu°)benzyl tert-amyl ether, l, 298.15 K ]/(J g-1)

| -39364.6 | -39399.1 | -39369.2 | -39375.2 | -39391.2 | -39392.2 |
| --- | --- | --- | --- | --- | --- |

| -cu°/(J g-1) | -39381.9±5.8 |
| --- | --- |
| (l)/(kJ mol-1) | -7030.8±2.5 |
| (l)/(kJ mol-1) | -263.8±3.0 |

**TABLE S4. Enthalpies of formation of alkyl halides taken in correlation with the (g) benzyl halides (all results in in kJ mol-1 from the reference 30)**

|  | C2H5 | i-C3H7 | t-C4H9 |
| --- | --- | --- | --- |
| Cl | -112.11.1 | -144.91.3 | -182.22.3 |
| Br | -61.91.7 | -99.42.5 | -132.41.8 |
| I | -7.51.7 | -40.33.8 | -72.03.3 |
